# Supplementary material for: Biochar application on paddy and purple soils in southern China: soil carbon and biotic activity
Source: R Soc Open Sci. 2019 Jul 10;6(7):181499. doi: 10.1098/rsos.181499 (PMC6689583; doi:10.1098/rsos.181499)
Supplement: Table S1 [file rsos181499supp4.docx]

Table S1 Characteristics of the biochar applied to the experimental plots.

| Variable | Biochar |
| --- | --- |
| Total C (%) | 52.8 |
| Total N (%) | 0.41 |
| pH | 9.36 |
| Ash (%) | 11.2 |
| Specific surface area（m2 g-1） | 16.7 |
| Nitrate-N (mg kg-1) | 0.38 |
| Aluminum (%) | 0.17 |
| Arsenic (mg kg-1) | <4 |
| Boron (mg kg-1) | 13 |
| Calcium (%) | 5.6 |
| Cadmium (mg kg-1) | <0.15 |
| Cobalt (mg kg-1) | 4.3 |
| Chromium (mg kg-1) | 7.9 |
| Copper (mg kg-1) | 26 |
| Iron (%) | 0.5 |
| Potassium (%) | 0.41 |
| Magnesium (%) | 1.22 |
| Manganese (mg kg-1) | 1893 |
| Molybdenum (mg kg-1) | 1.8 |
| Sodium (%) | 0.16 |
| Nickel (mg kg-1) | 5.8 |
| Phosphorus (%) | 2.3 |
| Lead (mg kg-1) | 3.7 |
| Sulfur (%) | 0.39 |
| Selenium (mg kg-1) | <3 |
| Zinc (mg kg-1) | 117 |
